# Supplementary material for: Obstacles and expectations of rare disease patients and their families in Türkiye: ISTisNA project survey results
Source: Frontiers journal article supplement (doi:10.3389/fpubh.2022.1049349), 2023-01-04
Supplement: Data_Sheet_1.PDF [file Data_Sheet_1.PDF]

## Supplementary Material

**Supplementary Table 1.** List of all patients' diagnoses

| Diagnosis of the patients (n=380)      | % (95% CI)       |
|----------------------------------------|------------------|
| DMD/BMD                                | 55.8 (51.0-61.0) |
| Mucopolysaccharidosis (MPS, all types) | 11.8 (9.0-16.0)  |
| Cystic Fibrosis                        | 8.70 (6.0-12.0)  |
| Albinism                               | 6.80 (5.0-10.0)  |
| Bladder exstrophy                      | 2.10 (1.0-4.0)   |
| Cri-du-Chat syndrome                   | 1.80 (1.0-4.0)   |
| Systemic sclerosis-scleroderma         | 1.60 (1.0-3.0)   |
| Familial Mediterranean Fever           | 1.10 (0.3-3.0)   |
| Limb-Girdle Muscular Dystrophy         | 1.10 (0.3-3.0)   |
| Retinitis Pigmentosa                   | 1.10 (0.3-3.0)   |
| Down syndrome                          | 0.80 (0.2-2.0)   |
| Pulmonary hypertension                 | 0.80 (0.2-2.0)   |
| Fabry disease                          | 0.50 (0.06-2.0)  |
| Rett syndrome                          | 0.50 (0.06-2.0)  |
| Cystinosis                             | 0.50 (0.06-2.0)  |
| Williams syndrome                      | 0.50 (0.06-2.0)  |
| 1q24 deletion syndrome                 | 0.30 (0.01-1.0)  |
| Ataxia-telangiectasia                  | 0.30 (0.01-1.0)  |
| Crohn's disease                        | 0.30 (0.01-1.0)  |
| Desbuquois syndrome                    | 0.30 (0.01-1.0)  |
| Eisenmenger syndrome                   | 0.30 (0.01-1.0)  |
| Kabuki Syndrome                        | 0.30 (0.01-1.0)  |

|                                     |                 |
|-------------------------------------|-----------------|
| Congenital muscular dystrophy       | 0.30 (0.01-1.0) |
| Lennox–Gastaut syndrome             | 0.30 (0.01-1.0) |
| Ohtahara syndrome                   | 0.30 (0.01-1.0) |
| Osteogenesis imperfecta             | 0.30 (0.01-1.0) |
| Osteopetrosis                       | 0.30 (0.01-1.0) |
| Primary Ciliary Dyskinesia          | 0.30 (0.01-1.0) |
| Spinal muscular atrophy             | 0.30 (0.01-1.0) |
| Tay-Sachs disease                   | 0.30 (0.01-1.0) |
| Treacher Collins syndrome           | 0.30 (0.01-1.0) |
| Thrombotic thrombocytopenic purpura | 0.30 (0.01-1.0) |
| ZTTK Syndrome                       | 0.30 (0.01-1.0) |

---

DMD/BMD: Duchenne Muscular Dystrophy/Becker Muscular Dystrophy. CI: Confidence Intervals.

**Supplementary Table 2.** Associations under Rare Disease Network and their number of members.

| Association Name (English)                                                          | Registered Members | Social Media Members (FB, Instagram, LinkedIn etc.) | URL                                                                                                                                 |
|-------------------------------------------------------------------------------------|--------------------|-----------------------------------------------------|-------------------------------------------------------------------------------------------------------------------------------------|
| MPS-LH Association-<br>Mucopolysaccharidosis Lysosomal Storage Diseases Association | 850                | 9335                                                | <a href="https://mpsturk.org/">https://mpsturk.org/</a>                                                                             |
| Cystic Fibrosis Family Assistance and Solidarity Association                        | 380                | 20934                                               | <a href="http://www.kifder.org.tr/">http://www.kifder.org.tr/</a>                                                                   |
| Pulmonary Hypertension and Scleroderma Patient Association                          | 300                | 6409                                                | <a href="https://www.pahssc.org.tr/">https://www.pahssc.org.tr/</a>                                                                 |
| Albinism Association                                                                | 198                | 4691                                                | <a href="https://www.albinizm.org.tr/">https://www.albinizm.org.tr/</a>                                                             |
| Achondroplasia and Family Association                                               | 83                 | 1081                                                | <a href="https://akondroplazi.org.tr/">https://akondroplazi.org.tr/</a>                                                             |
| Türkiye Spinal Muscular Atrophy Association                                         | 70                 | 31015                                               | <a href="https://www.sma.org.tr/">https://www.sma.org.tr/</a>                                                                       |
| Duchenne muscular dystrophy Family Association                                      | 63                 | 17960                                               | <a href="https://www.dmdaileleri.org/">https://www.dmdaileleri.org/</a>                                                             |
| Rare Autoimmune Rheumatic Diseases Solidarity Association                           | 55                 | 7749                                                | <a href="http://www.faromder.org/">http://www.faromder.org/</a>                                                                     |
| Williams Syndrome Association                                                       | 48                 | 1263                                                | No available web site                                                                                                               |
| Phenylketonuria Family Association                                                  | 45                 | 12365                                               | <a href="https://www.pkuaile.com/">https://www.pkuaile.com/</a>                                                                     |
| Association for Life with Ataxia Telangiectasia                                     | 42                 | 1551                                                | <a href="https://atileyasam.org/">https://atileyasam.org/</a>                                                                       |
| Retinitis Pigmentosa Patients Platform                                              | 110                | 4200                                                | <a href="https://www.facebook.com/groups/166960586675729/?ref=share">https://www.facebook.com/groups/166960586675729/?ref=share</a> |
| Cystinosis Patients Association                                                     | 79                 | 1273                                                | <a href="https://www.sistinder.org/">https://www.sistinder.org/</a>                                                                 |
| Tay-Sachs and Sandoff Charity Association                                           | 25                 | 1133                                                | <a href="https://www.instagram.com/taysachsandhoff/">https://www.instagram.com/taysachsandhoff/</a>                                 |
| Happy With My Face Association                                                      | 43                 | 13300                                               | <a href="http://www.yuzumlemutluyum.org.tr/">www.yuzumlemutluyum.org.tr/</a>                                                        |
| Total                                                                               | 2391               | <b>134259</b>                                       |                                                                                                                                     |

**Supplementary Table 3.** Additional support for patient care

| <i>Supportive individuals/services for additional patient care (n=289)*</i>                | <i>%</i> |
|--------------------------------------------------------------------------------------------|----------|
| Parent                                                                                     | 64.0     |
| Family member                                                                              | 33.6     |
| Private care service from personal budget                                                  | 26.6     |
| None of them                                                                               | 21.5     |
| Social or community services                                                               | 13.5     |
| Friends                                                                                    | 6.2      |
| Private care service from patient organizations                                            | 3.1      |
| <i>Average hours of support per week for rehabilitation services and therapies (n=284)</i> | <i>%</i> |
| **                                                                                         |          |
| No support                                                                                 | 39.9     |
| 1-2 hours                                                                                  | 38.5     |
| 3 - 4 hours                                                                                | 15.3     |
| 5 - 8 hours                                                                                | 4.2      |
| 9 - 12 hours                                                                               | 1.0      |
| More than 12 hours                                                                         | 1.0      |

\*Participants could select more than one option, \*\*occupational therapy, speech, or physical therapy, etc.

**Supplementary Table 4.** Impact of the rare disease on patient's lives

| <i>The rare disease into our lives ... (n=244) *</i>  | %    |
|-------------------------------------------------------|------|
| Restricted our social life.                           | 75.8 |
| Caused our revenue to decline.                        | 41.8 |
| Caused us to reduce / stop our professional activity. | 36.1 |
| Caused us to disconnect from our entourage            | 34.8 |
| Limited our professional choices.                     | 32.4 |
| Limited our employment opportunities.                 | 27.1 |
| Prevented our access to higher levels of education.   | 17.6 |
| Limited promotion opportunity.                        | 11.1 |

\*Participants could select more than one option.

**Supplementary Table 5.** Patients' perceptions of participating in clinical trials.

| <i>Would the patient consider participating in research studies on information gathering about the disease?*</i> (n=411) | % (95% CI)   |
|--------------------------------------------------------------------------------------------------------------------------|--------------|
| After receiving detailed information about the study, it may be.                                                         | 44.5 (40-49) |
| Yes.                                                                                                                     | 43.6 (39-49) |
| No.                                                                                                                      | 11.9 (9-15)  |
| <i>Would the patient consider participating in clinical trials on the disease?*</i> (n= 410)                             | % (95% CI)   |
| After receiving detailed information about the study, it may be.                                                         | 50.8 (46-56) |
| Yes.                                                                                                                     | 39.0 (34-44) |
| No.                                                                                                                      | 10.2 (7-14)  |

\* Does the patient's relative give consent for the patient to participate in research for information gathering (If a guardian was appointed)?
